# Supplementary material for: Modulating Drought Stress Response of Maize by a Synthetic Bacterial Community
Source: PubMed Central journal article supplement (PMC8566980; doi:10.3389/fmicb.2021.747541), 2021-10-21
Supplement: Image_2.pdf [file Image_2.pdf]

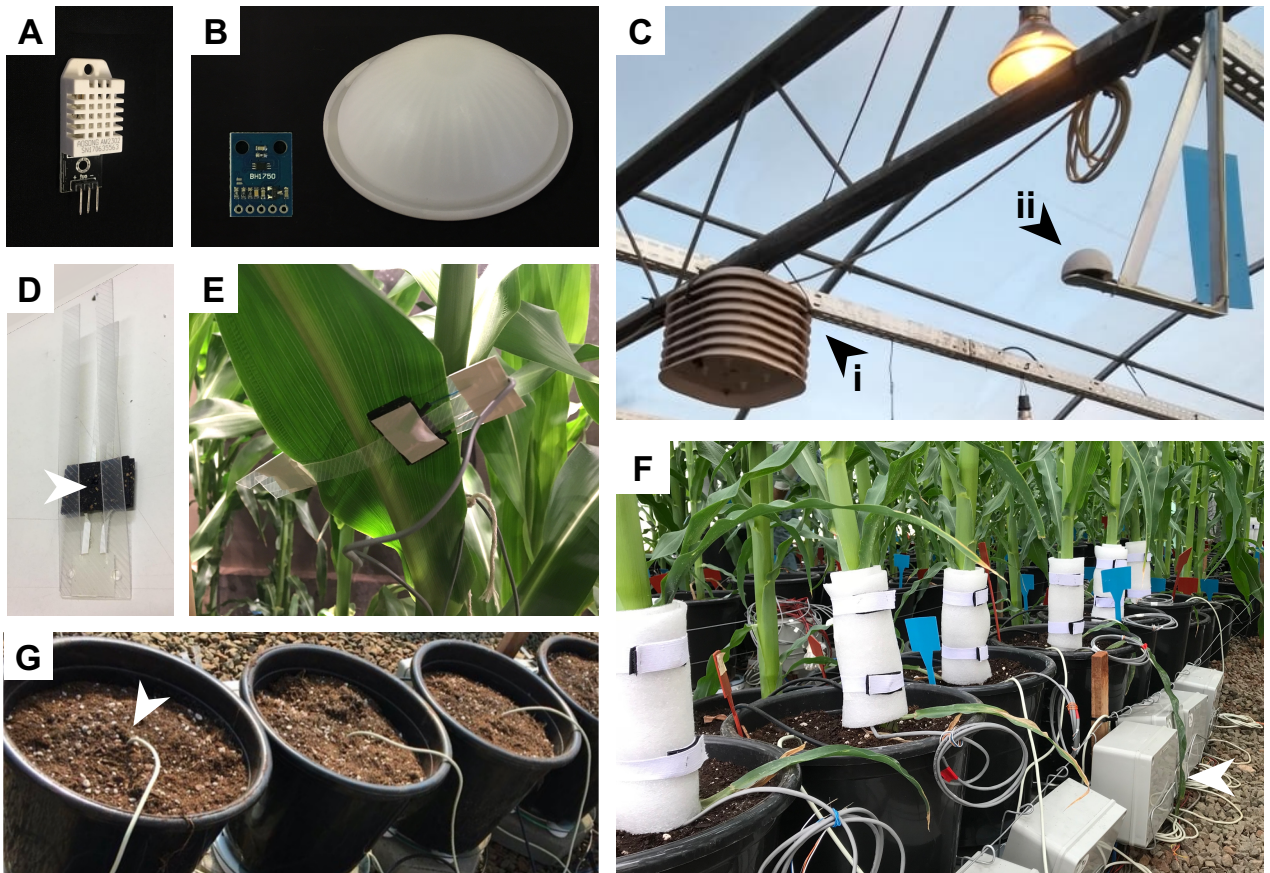

**SUPPLEMENTARY FIGURE 2** | Sensors and materials used for the non-invasive real-time phenotyping platform. **(A)** Sensor for air temperature and RH. **(B)** Module for measurement of PAR (left) and light diffuser bulb (right) used. **(C)** Bottom side view of the environmental sensors positioned at the top of the greenhouse with the air temperature and RH sensor protected by a solar radiation shield (subpanel *i*) and the module for the PAR sensor inside the light diffuser bulb (subpanel *ii*). **(D)** Sensor for  $T_{leaf}$  constructed with a malleable polypropylene sheet and cork, with a thermistor placed inside the 1-mm hole (white arrow). **(E)**  $T_{leaf}$  sensor positioned at the abaxial leaf surface. **(F)** Apparatus for the measurement of sap flow in plant stems and boxes of data control and acquisition for each pot (white arrow). **(G)** Capacitive soil moisture sensors positioned in the pots (white arrow). RH, air relative humidity; PAR, photosynthetically active radiation;  $T_{leaf}$ , leaf temperature.
