# Supplementary material for: Modulating Drought Stress Response of Maize by a Synthetic Bacterial Community
Source: PubMed Central journal article supplement (PMC8566980; doi:10.3389/fmicb.2021.747541), 2021-10-21
Supplement: Image_9.pdf [file Image_9.pdf]

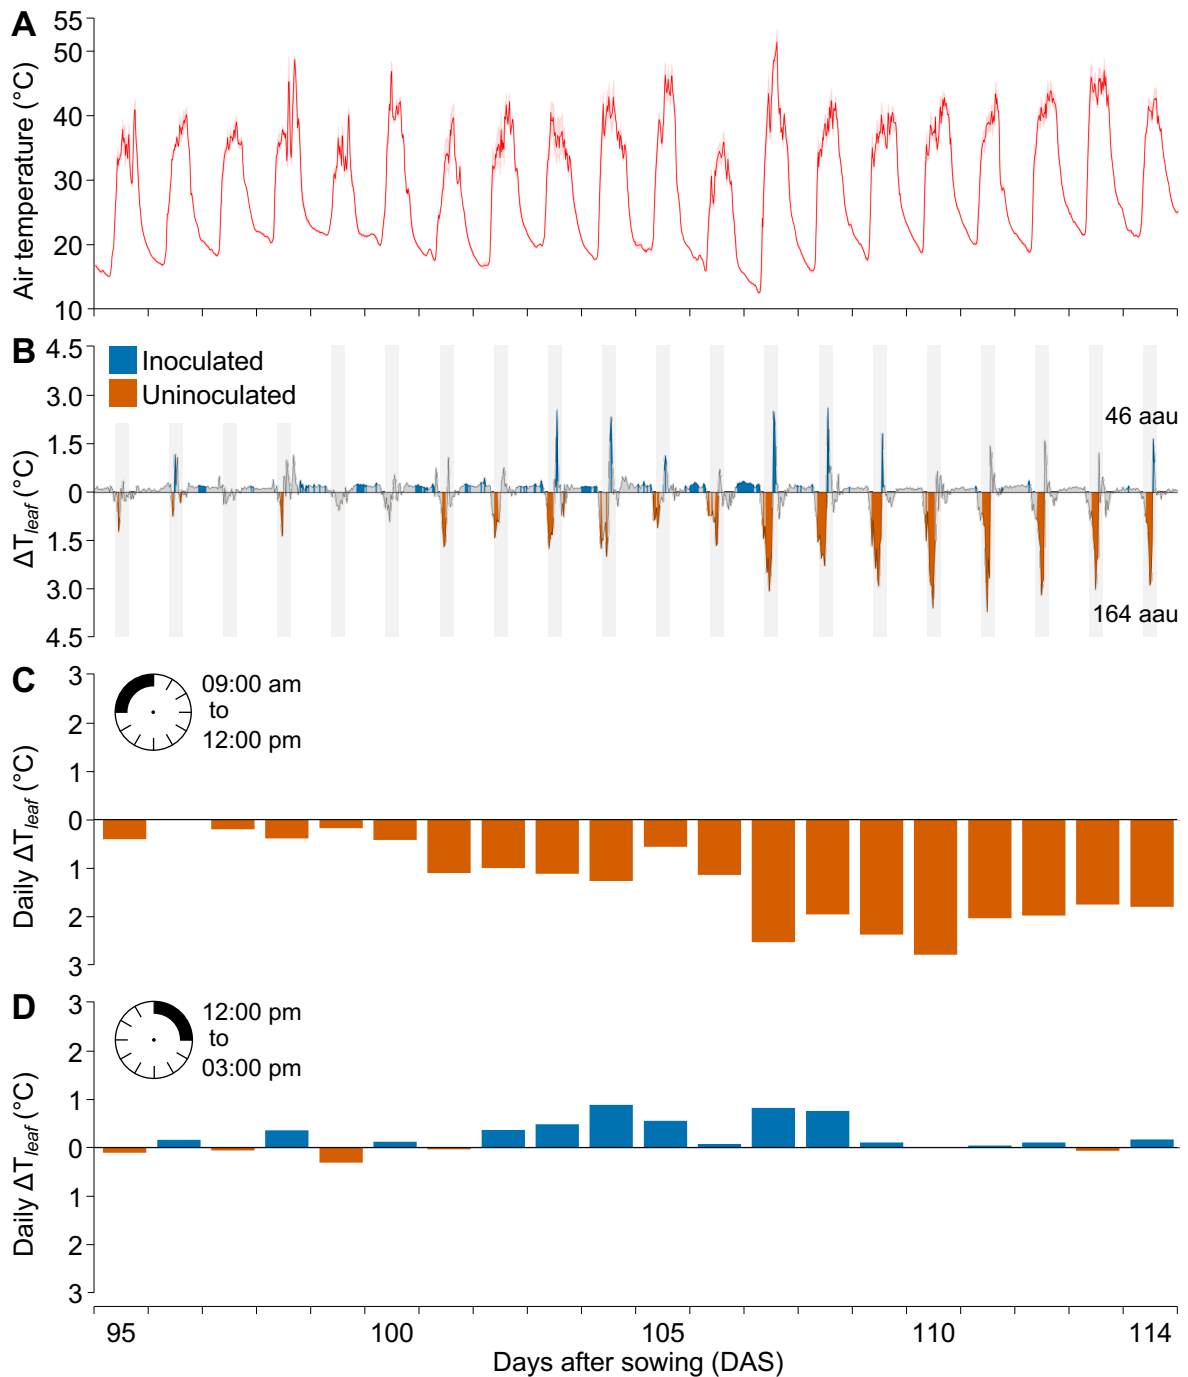

**SUPPLEMENTARY FIGURE 9** | SynCom delays the  $T_{leaf}$  increase in SX7341 maize plants under WW conditions. **(A)** Fluctuation of air temperature detected by the real-time phenotyping platform from 95–114 DAS. **(B)** The differences in  $T_{leaf}$  between inoculated and uninoculated plants ( $\Delta T_{leaf}$ ) rounded every 30 min over time, revealed that the  $T_{leaf}$  of inoculated plants was, in general, overcome by the  $T_{leaf}$  of uninoculated plants (46 against 4,164 aau, respectively). Values were displayed above the x-axis when  $T_{leaf}$  of inoculated plants is higher than  $T_{leaf}$  of uninoculated ones or below the x-axis when  $T_{leaf}$  of uninoculated plants is higher than  $T_{leaf}$  of inoculated ones, and colored in blue or red, respectively, when significantly different ( $P \leq 0.05$ ). Areas filled with light gray denote not statistically significant differences. The sums of areas in the graph above and below the x-axis were considered only for statistically significant differences. The gray background highlights daily windows from 9:00 am to 3:00 pm, as shown in panels C and D. **(C)** In daily periods from 9:00 am to 12:00 pm, the  $T_{leaf}$  of inoculated plants was overcome by the  $T_{leaf}$  of uninoculated plants. **(D)** In contrast, in the subsequent daily periods, from 12:00 pm to 3:00 pm, the  $T_{leaf}$  of the inoculated plants was found to be higher than the  $T_{leaf}$  in uninoculated plants. WW, well watering;  $T_{leaf}$ , leaf temperature;  $\Delta T_{leaf}$ , difference of  $T_{leaf}$ ; aau, arbitrary area units; DAS, days after sowing.
