# Supplementary material for: Modulating Drought Stress Response of Maize by a Synthetic Bacterial Community
Source: PubMed Central journal article supplement (PMC8566980; doi:10.3389/fmicb.2021.747541), 2021-10-21
Supplement: Image_10.pdf [file Image_10.pdf]

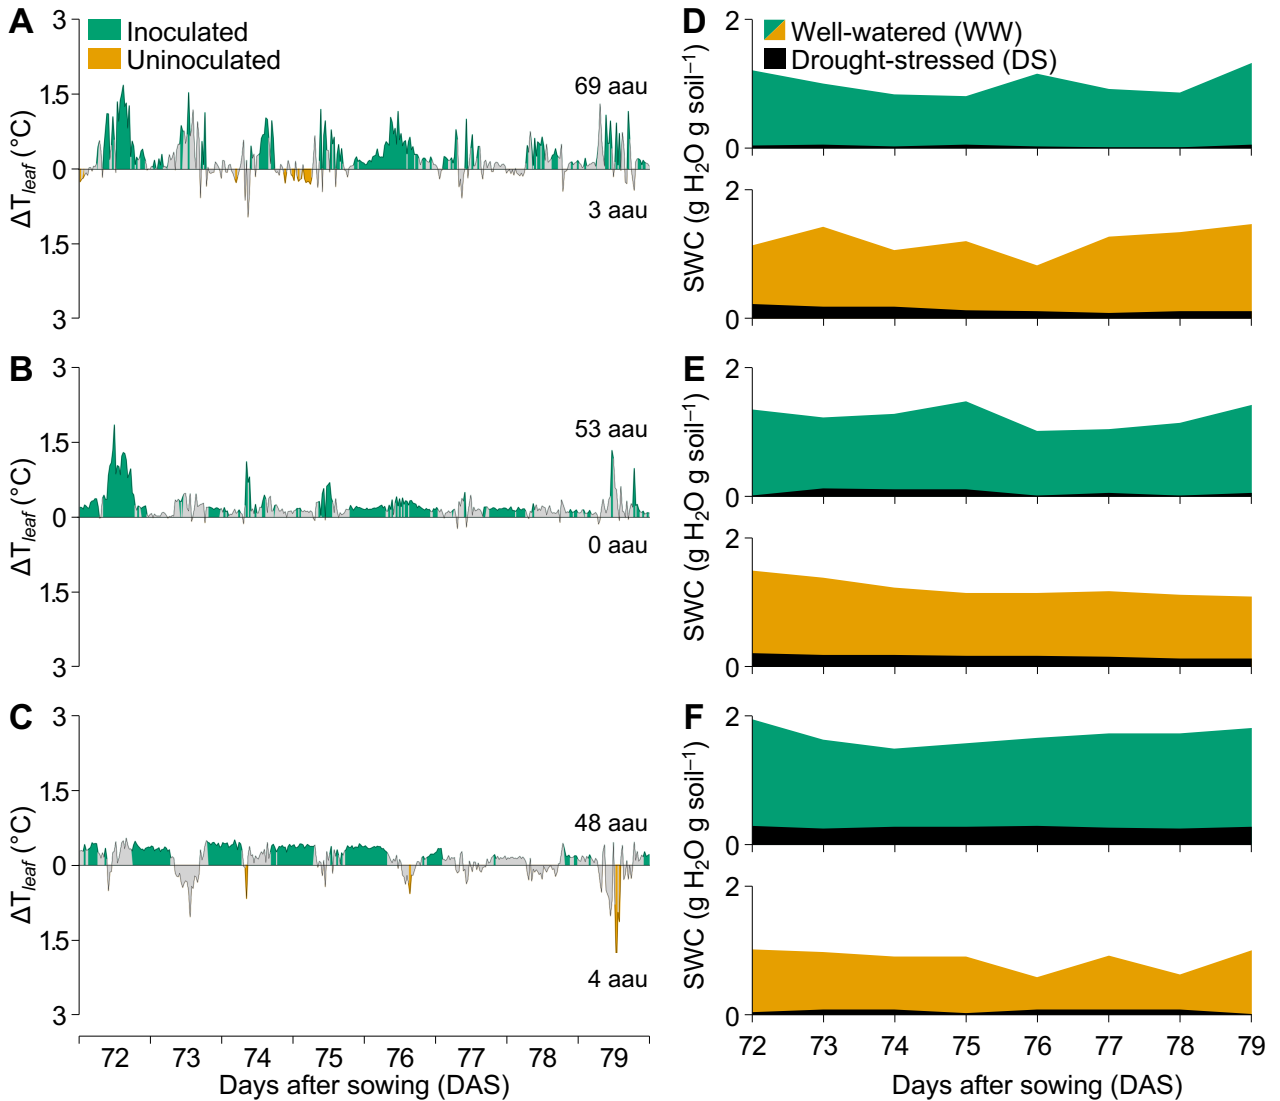

**SUPPLEMENTARY FIGURE 10 |** SynCom induces an increase in the  $T_{leaf}$  of maize plants under DS conditions. (A–C) The differences in  $T_{leaf}$  between inoculated and uninoculated plants ( $\Delta T_{leaf}$ ), rounded every 30 min over time, revealed that SynCom increased  $T_{leaf}$  among all hybrids under DS conditions for 72–79 DAS immediately before rehydration. Values were displayed above the x-axis when  $T_{leaf}$  of inoculated plants was higher than  $T_{leaf}$  of uninoculated plants or below the x-axis when  $T_{leaf}$  of uninoculated plants is higher than  $T_{leaf}$  of inoculated plants, and colored in blue or red, respectively, when significantly different ( $P \leq 0.05$ ). Areas filled with light gray denote not statistically significant differences. The sums of areas in the graph above and below the x-axis were considered only for statistically significant differences. The exhibited period represents a window showing that  $T_{leaf}$  of inoculated DKB177 (A), SX7341 (B), and P3707VYH (C) had a significant increase in  $T_{leaf}$  when compared with the control plants, as shown by colored areas in the graph. (D–F) Measures of SWC showed that inoculated (green) or uninoculated (orange) WW-treated plants were maintained with a high soil moisture when compared with those under DS (black), as shown for DKB177 (D), SX7341 (E), and P3707VYH (F). Due to the large variation in SWC throughout the day, graphs presented the midnight datapoint of each day from 72–79 DAS for  $n \leq 4$  pots. SD were omitted since the comparison of every shown WW and DS datapoint was statistically significant ( $P \leq 0.001$ ).  $T_{leaf}$ , leaf temperature;  $\Delta T_{leaf}$ , difference of  $T_{leaf}$ ; aau, arbitrary area units; SWC, soil water content; WW, well watering; DS, drought stress; DAS, days after sowing; SD, standard deviation.
