# Supplementary material for: Modulating Drought Stress Response of Maize by a Synthetic Bacterial Community
Source: PubMed Central journal article supplement (PMC8566980; doi:10.3389/fmicb.2021.747541), 2021-10-21
Supplement: Image_11.pdf [file Image_11.pdf]

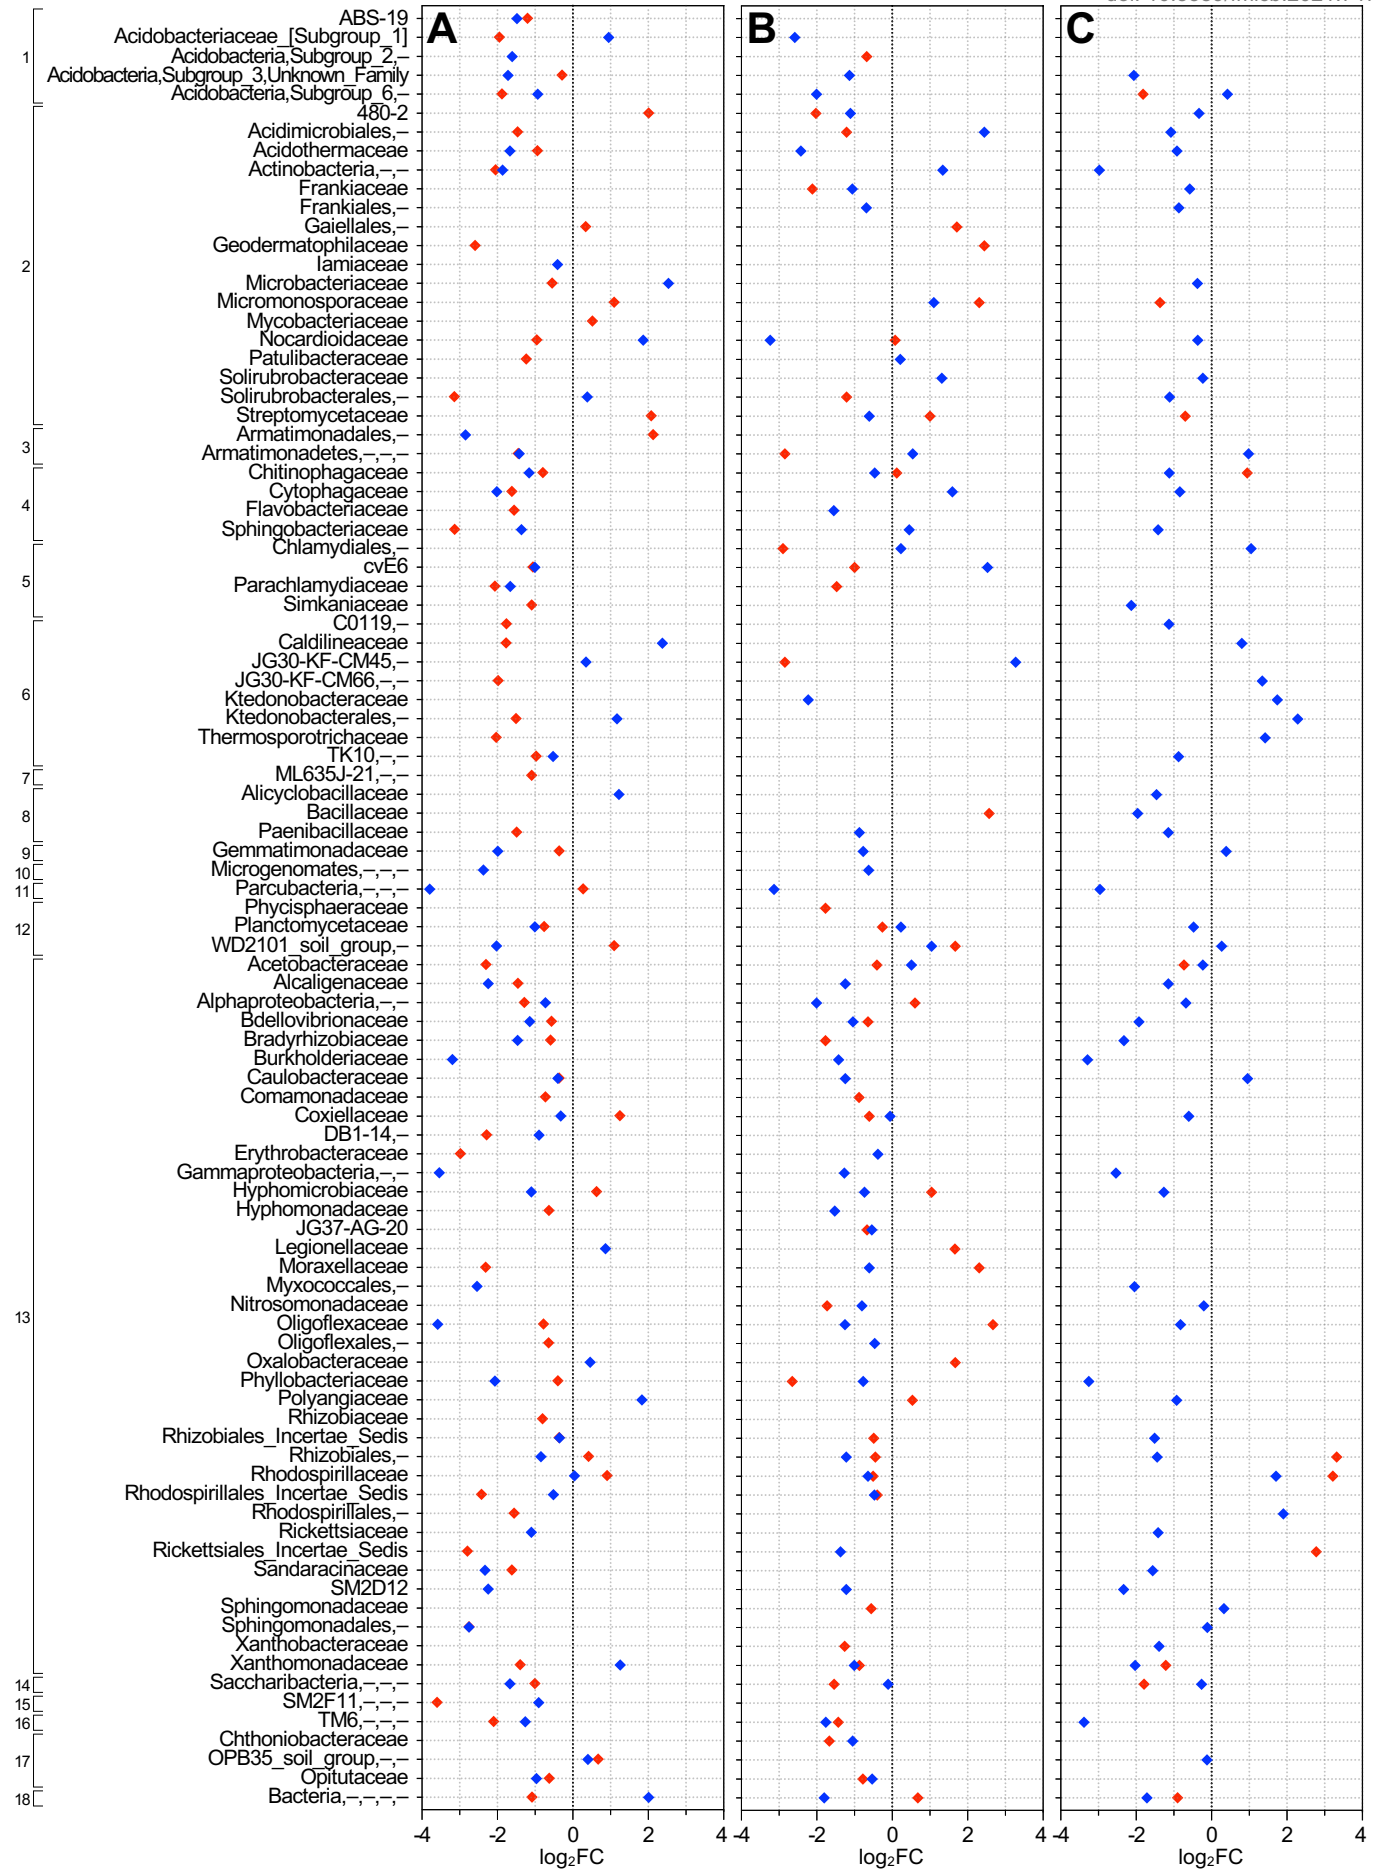

**SUPPLEMENTARY FIGURE 11 |** Enriched and depleted resident microbial groups in inoculated plants. Enrichment and depletion of families in DKB177 (A), SX7341 (B), and P3707VYH (C) shown for WW- (blue) and DS-treated (red) plants. Only significant ( $P \leq 0.05$ ) shifts in inoculation were considered, with OTUs collapsed at the taxonomic level of the family. Families comprised of a single OTU were omitted. "Unknown" taxonomic levels were collapsed to the deepest common levels, comma-separated, and "unknown" taxa represented as "-". FC, fold change; Un., unknown.
