# Supplementary material for: Modulating Drought Stress Response of Maize by a Synthetic Bacterial Community
Source: PubMed Central journal article supplement (PMC8566980; doi:10.3389/fmicb.2021.747541), 2021-10-21
Supplement: Table_1.pdf [file Table_1.pdf]

**SUPPLEMENTARY TABLE 1** | Three-way ANOVA for phenotypic parameters (yield per plant, kernels per plant, kernel rows per ear, ear diameter, ear length, and aerial biomass) of genotype, irrigation regime, inoculation and all their possible interactions. \* $P \leq 0.05$ , \*\* $P \leq 0.01$ , and \*\*\* $P \leq 0.001$ .

| Factor                                     | Yield per plant | Kernels per plant | Kernel rows per ear | Ear diameter | Ear length | Aerial biomass |
|--------------------------------------------|-----------------|-------------------|---------------------|--------------|------------|----------------|
| Genotype                                   | 0.0322 *        | 0.0011 **         | 0.0000 ***          | 0.0093 **    | 0.0076 **  | 0.8992         |
| Irrigation regime                          | 0.0000 ***      | 0.0000 ***        | 0.0000 ***          | 0.0000 ***   | 0.0585     | 0.0000 ***     |
| Inoculation                                | 0.1153          | 0.0277 *          | 0.2793              | 0.0000 ***   | 0.0000 *** | 0.0906         |
| Genotype × Watering regime                 | 0.0644          | 0.0011 **         | 0.0000 ***          | 0.0651       | 0.3333     | 0.5253         |
| Genotype × Inoculation                     | 0.0005 ***      | 0.0709            | 0.0000 ***          | 0.0001 ***   | 0.1634     | 0.6675         |
| Irrigation regime × Inoculation            | 0.0746          | 0.0078 **         | 0.0000 ***          | 0.0000 ***   | 0.3373     | 0.2371         |
| Genotype × Irrigation regime × Inoculation | 0.9863          | 0.1572            | 0.0035 **           | 0.0019 **    | 0.0028 **  | 0.6397         |

doi: 10.3389/fmicb.2021.747541
