# Supplementary material for: Modulating Drought Stress Response of Maize by a Synthetic Bacterial Community
Source: PubMed Central journal article supplement (PMC8566980; doi:10.3389/fmicb.2021.747541), 2021-10-21
Supplement: Table_2.pdf [file Table_2.pdf]

**SUPPLEMENTARY TABLE 2** | Harvest index (HI) for inoculated and uninoculated DKB177, SX7341, and P3707VYH under WW and DS conditions. WW, well watering; DS, drought stress.

|    |          | Uninoculated                            |                                              |                      | Inoculated                              |                                              |                      |
|----|----------|-----------------------------------------|----------------------------------------------|----------------------|-----------------------------------------|----------------------------------------------|----------------------|
|    |          | Grain yield<br>(g plant <sup>-1</sup> ) | Biological yield<br>(g plant <sup>-1</sup> ) | Harvest index<br>(%) | Grain yield<br>(g plant <sup>-1</sup> ) | Biological yield<br>(g plant <sup>-1</sup> ) | Harvest index<br>(%) |
| WW | DKB177   | 90.01                                   | 167.34                                       | 35.0%                | 101.25                                  | 180.16                                       | 36.0%                |
|    | SX7341   | 108.48                                  | 168.27                                       | 39.2%                | 85.99                                   | 170.94                                       | 33.5%                |
|    | P3707VYH | 65.45                                   | 187.45                                       | 25.9%                | 81.09                                   | 174.16                                       | 31.8%                |
| DS | DKB177   | 9.84                                    | 149.73                                       | 6.2%                 | 38.72                                   | 118.19                                       | 24.7%                |
|    | SX7341   | 38.50                                   | 137.82                                       | 21.8%                | 30.51                                   | 129.98                                       | 19.0%                |
|    | P3707VYH | 12.38                                   | 153.83                                       | 7.5%                 | 42.65                                   | 138.56                                       | 23.5%                |

doi: 10.3389/fmicb.2021.747541
