# Supplementary material for: Modulating Drought Stress Response of Maize by a Synthetic Bacterial Community
Source: PubMed Central journal article supplement (PMC8566980; doi:10.3389/fmicb.2021.747541), 2021-10-21
Supplement: Table_3.pdf [file Table_3.pdf]

**SUPPLEMENTARY TABLE 3** | Relative abundance of community-based isolates considered robust colonizers in WW- and DS-treated inoculated DKB177, SX7341, and P3707VYH hybrids. WW, well watering; DS, drought stress; Un., unknown. \* $P \leq 0.05$ , \*\* $P \leq 0.01$ , and \*\*\* $P \leq 0.001$ .

| Community-based isolates        | OTU      | Well watering (WW) |           |           | Drought stress (DS) |           |           |
|---------------------------------|----------|--------------------|-----------|-----------|---------------------|-----------|-----------|
|                                 |          | DKB177             | SX7341    | P3707VYH  | DKB177              | SX7341    | P3707VYH  |
| <i>Agrobacterium</i> sp. E09    | Otu2018  | 0.95%              | 1.55%     | 0.83%     | 0.52%               | 1.50%     | 1.08% **  |
|                                 | Otu15158 | 0.01% *            | 0.01%     | 0.01% *   | 0.01% *             | 0.01% **  | 0.01% *** |
| <i>Asticcacaulis</i> sp. F02    | Otu22    | 0.80%              | 0.59%     | 0.74%     | 0.96%               | 0.61%     | 0.77%     |
| <i>Burkholderia</i> sp. A10     | Otu11    | 1.67%              | 3.88%     | 2.62%     | 4.19%               | 1.61%     | 2.55%     |
|                                 | Otu199   | 0.18%              | 0.41%     | 0.42%     | 0.53%               | 0.08%     | 0.21%     |
|                                 | Otu17761 | 0.19% ***          | 0.13% *** | 0.10% *   | 0.13% *             | 0.07% *   | 0.09% *** |
| <i>Dyella</i> sp. G12           | Otu30    | 0.55%              | 0.42%     | 0.62%     | 0.54%               | 0.58%     | 0.66%     |
| <i>Ensifer</i> sp. B04          | Otu114   | 0.86% *            | 0.79%     | 0.78% *   | 0.87% **            | 0.72%     | 0.81% *** |
| <i>Enterobacter</i> sp. B02     | Otu18    | 0.39%              | 0.78%     | 0.62%     | 0.75% **            | 0.85% *** | 0.62%     |
|                                 | Otu186   | 0.06% *            | 0.16%     | 0.11%     | 0.05% ***           | 0.04%     | 0.05% **  |
| <i>Lysobacter</i> sp. A02       | Otu9     | 0.13% **           | 0.10%     | 0.09%     | 0.10% **            | 0.06% *** | 0.11% **  |
| <i>Microbacterium</i> sp. C05   | Otu3200  | 0.03%              | 0.05%     | 0.03%     | 0.02%               | 0.04%     | 0.03%     |
| <i>Pantoea</i> sp. B02/C12      | Otu16006 | 0.15% **           | 0.10% *   | 0.13% *** | 0.13% *             | 0.13% *** | 0.14% *** |
| <i>Pedobacter</i> sp. A01       | Otu29    | 0.15% **           | 0.08% *   | 0.08% **  | 0.10% **            | 0.08% **  | 0.07% **  |
| <i>Sphingomonas</i> sp. D05     | Otu255   | 0.53%              | 0.48%     | 0.55%     | 0.50%               | 0.58%     | 0.47%     |
|                                 | Otu16330 | 0.00% ***          | 0.00%     | 0.00% **  | 0.00% *             | 0.00% **  | 0.00% **  |
| <i>Stenotrophomonas</i> sp. E09 | Otu20    | 0.19% *            | 0.09%     | 0.11% *** | 0.08% *             | 0.06%     | 0.13% *   |
| <i>Streptomyces</i> sp. G01     | Otu1098  | 0.37% *            | 0.45% *** | 0.49% *** | 0.31% **            | 0.51% *** | 0.34% *** |
|                                 | Otu8216  | 0.43% **           | 0.45% *   | 0.31%     | 0.41%               | 0.24% *   | 0.29% *   |
| Un. Bradyrhizobiaceae C05       | Otu64    | 0.23%              | 0.24%     | 0.22%     | 0.11%               | 0.26%     | 0.25%     |
| Un. Xanthomonadaceae B08        | Otu84    | 0.44% **           | 0.25%     | 0.20% *   | 0.49% **            | 0.23% *   | 0.23% **  |
| Un. Xanthomonadaceae G08        | Otu12    | 0.43% **           | 0.39% *   | 0.47% **  | 0.47% *             | 0.30% *   | 0.32% **  |
| <i>Variovorax</i> sp. F04       | Otu45    | 0.49%              | 0.43%     | 0.41% *   | 0.45% **            | 0.46%     | 0.42%     |
